# Supplementary material for: Don't discount all curcumin trial data
Source: Springer Nature journal article supplement (doi:10.1038/543040c), 2017-02-28
Supplement: 41586_2017_BF543040c_MOESM1_ESM.pdf [file 41586_2017_BF543040c_MOESM1_ESM.pdf]

## Supplementary information to: Don't discount all curcumin trial data

Supplementary references and the full list of signatories to a Correspondence published in *Nature* **543**, 40 (2017);

<http://dx.doi.org/10.1038/543040c>

We argue that the clinical potential of the spice extract curcumin should not be dismissed simply on the grounds that it yields confusing results in molecular drug screens (*Nature* **541**, 144–145; 2017; see also K. M. Nelson *et al.* *J. Med. Chem.* <http://doi.org/bw46>; 2017).

Nelson and colleagues claim a lack of evidence for curcumin's therapeutic benefits "despite thousands of research papers and more than 120 clinical trials" ([www.clinicaltrials.gov](http://www.clinicaltrials.gov)). However, a PubMed search under 'curcumin double-blind placebo-controlled clinical trial' yields 49 entries, of which 17 recent trials show efficacy<sup>1–17</sup>. In addition, there are 27 other clinical trials (for example, refs 18–24) and at least 5 animal studies of curcumin that point to therapeutic benefits (for example, refs 25–28).

The assumption that a drug candidate must have a single known target and compatibility with high-throughput screening to enter the clinic can preclude promising drug candidates (R. L. Elliott *Am. Chem. Soc. Med. Chem. Lett.* **3**, 688–690; 2012). Current detection methods for target engagement cannot gauge the full pharmacological spectrum of an investigational drug, so should be used with other screening paradigms. Also, the binding behaviour of curcumin to multiple molecular targets is associated with modulation rather than outright inhibition<sup>29,30</sup>. And high-throughput screening is prone to technical artefacts that can make it a deceptive arbiter for excluding potential drugs.

In light of these considerations, curcumin's molecular targets and their regulatory mechanisms warrant further investigation if we are to build on the promising results that are already to hand in humans and animals.

- Lopresti, A. L. & Drummond, P. D. Efficacy of curcumin, and a saffron/curcumin combination for the treatment of major depression: A randomised, double-blind, placebo-controlled study. *J. Affect. Disord.* **207**, 188–196 (2017).
- Yu, J. J., Pei, L. B., Zhang, Y., Wen, Z. Y. & Yang, J. L. Chronic supplementation of curcumin enhances the efficacy of antidepressants in major depressive disorder: A randomized, double-blind, placebo-controlled pilot study. *J. Clin. Psychopharmacol.* **35**, 406–410 (2015).
- Pandaran Sudheeran, S. *et al.* Safety, tolerance, and enhanced efficacy of a bioavailable formulation of curcumin with fenugreek dietary fiber on occupational stress: a randomized, double-blind, placebo-controlled pilot study. *J. Clin. Psychopharmacol.* **36**, 236–243, doi:10.1097/JCP.0000000000000508 (2016).
- Rahmani, S. *et al.* Treatment of non-alcoholic fatty liver disease with curcumin: a randomized placebo-controlled trial. *Phytother. Res.* **30**, 1540–1548, doi:10.1002/ptr.5659 (2016).
- Fanaei, H., Khayat, S., Kasaeian, A. & Javadimehr, M. Effect of curcumin on serum brain-derived neurotrophic factor levels in women with premenstrual syndrome: A randomized, double-blind, placebo-controlled trial. *Neuropeptides* **56**, 25–31, doi:10.1016/j.npep.2015.11.003 (2016).
- Khayat, S. *et al.* Curcumin attenuates severity of premenstrual syndrome symptoms: A randomized, double-blind, placebo-controlled trial. *Complement. Ther. Med.* **23**, 318–324, doi:10.1016/j.ctim.2015.04.001 (2015).
- Yang, Y. S. *et al.* Lipid-lowering effects of curcumin in patients with metabolic syndrome: a randomized, double-blind, placebo-controlled trial. *Phytother. Res.* **28**, 1770–1777, doi:10.1002/ptr.5197 (2014).
- Rahimnia, A. R., Panahi, Y., Alishiri, G., Sharafi, M. & Sahebkar, A. Impact of supplementation with curcuminoids on systemic inflammation in patients with knee osteoarthritis: findings from a randomized double-blind placebo-controlled trial. *Drug Res. (Stuttgart)* **65**, 521–525, doi:10.1055/s-0034-1384536 (2015).
- McFarlin, B. K. *et al.* Reduced inflammatory and muscle damage biomarkers following oral supplementation with bioavailable curcumin. *Biochem. Biophys. Acta Clin.* **5**, 72–78, doi:10.1016/j.bbacia.2016.02.003 (2016).
- Chuengsamarn, S., Rattanamongkolgul, S., Phonrat, B., Tungtrongchitr, R. & Jirawatnotai, S. Reduction of atherogenic risk in patients with type 2 diabetes by curcuminoid extract: a randomized controlled trial. *J. Nutr. Biochem.* **25**, 144–150, doi:10.1016/j.jnutbio.2013.09.013 (2014).
- Panahi, Y., Saadat, A., Beiraghdar, F. & Sahebkar, A. Adjuvant therapy with bioavailability-boosted curcuminoids suppresses systemic inflammation and improves quality of life in patients with solid tumors: a randomized double-blind placebo-controlled trial. *Phytother. Res.* **28**, 1461–1467, doi:10.1002/ptr.5149 (2014).
- Hejazi, J. *et al.* Effect of curcumin supplementation during radiotherapy on oxidative status of patients with prostate cancer: a double blinded, randomized, placebo-controlled study. *Nutr. Cancer* **68**, 77–85, doi:10.1080/01635581.2016.1115527 (2016).
- Nakagawa, Y. *et al.* Short-term effects of highly-bioavailable curcumin for treating knee osteoarthritis: a randomized, double-blind, placebo-controlled prospective study. *J. Orthop. Sci.* **19**, 933–939, doi:10.1007/s00776-014-0633-0 (2014).
- Panahi, Y., Alishiri, G. H., Parvin, S. & Sahebkar, A. Mitigation of systemic oxidative stress by curcuminoids in osteoarthritis: results of a randomized controlled trial. *J. Diet Suppl.* **13**, 209–220, doi:10.3109/19390211.2015.1008611 (2016).
- Lang, A. *et al.* Curcumin in combination with mesalazine induces remission in patients with mild-to-moderate ulcerative colitis in a randomized controlled trial. *Clin. Gastroenterol. Hepatol.* **13**, 1444–1449 e1441, doi:10.1016/j.cgh.2015.02.019 (2015).
- Singla, V. *et al.* Induction with NCB-02 (curcumin) enema for mild-to-moderate distal ulcerative colitis - a randomized, placebo-controlled, pilot study. *J. Crohns Colitis* **8**, 208–214, doi:10.1016/j.crohns.2013.08.006 (2014).
- Panahi, Y. *et al.* Antioxidant and anti-inflammatory effects of curcuminoid-piperine combination in subjects with metabolic syndrome: A randomized controlled trial and an updated meta-analysis. *Clin. Nutr.* **34**, 1101–1108, doi:10.1016/j.clnu.2014.12.019 (2015).
- Antiga, E., Bonciolini, V., Volpi, W., Del Bianco, E. & Caproni, M. Oral curcumin (meriva) is effective as an adjuvant treatment and is able to reduce IL-22 serum levels in patients with psoriasis vulgaris. *Biomed. Res. Int.* **2015**, 283634, doi:10.1155/2015/283634 (2015).
- Drobnic, F. *et al.* Reduction of delayed onset muscle soreness by a novel curcumin delivery system (Meriva(R)): a randomised, placebo-controlled trial. *J. Int. Soc. Sports Nutr.* **11**, 31, doi:10.1186/1550-2783-11-31 (2014).
- Santos-Parker, J. R. *et al.* Curcumin supplementation improves vascular endothelial function in healthy middle-aged and older adults by increasing nitric oxide bioavailability and reducing oxidative stress. *Aging (Albany NY)*, doi:10.18632/aging.101149 (2017).
- Hazarey, V. K., Sakrikar, A. R. & Ganvir, S. M. Efficacy of curcumin in the treatment for oral submucous fibrosis - a randomized clinical trial. *J. Oral Maxillofac. Pathol.* **19**, 145–152, doi:10.4103/0973-029X.164524 (2015).
- Nahar, P. P., Slitt, A. L. & Seeram, N. P. Anti-inflammatory effects of novel standardized solid lipid curcumin formulations. *J. Med. Food* **18**, 786–792, doi:10.1089/jmf.2014.0053 (2015).
- DiSilvestro, R. A., Joseph, E., Zhao, S. & Bomser, J. Diverse effects of a low dose supplement of lipidated curcumin in healthy middle aged people. *Nutr. J.* **11**, 79, doi:10.1186/1475-2891-11-79 (2012).
- Cox, K. H., Pipingas, A. & Scholey, A. B. Investigation of the effects of solid lipid curcumin on cognition and mood in a healthy older population. *J. Psychopharmacol.* **29**, 642–651, doi:10.1177/0269881114552744 (2015).
- Prior, M. *et al.* Back to the future with phenotypic screening. *Am. Chem. Soc. Chem. Neurosci.* **5**, 503–513, doi:10.1021/cn500051h (2014).
- Koronyo, Y., Salumbides, B. C., Black, K. L. & Koronyo-Hamaoui, M. Alzheimer's disease in the retina: imaging retinal abeta plaques for early diagnosis and therapy assessment. *Neurodegener. Dis.* **10**, 285–293, doi:10.1159/000335154 (2012).
- Zhang, X. *et al.* Curcumin analogues as selective fluorescence imaging probes for brown adipose tissue and monitoring browning. *Sci. Rep.* **5**, 13116, doi:10.1038/srep13116 (2015).
- Garcia-Alloza, M., Borrelli, L. A., Rozkalne, A., Hyman, B. T. & Bacskaï, B. J. Curcumin labels amyloid pathology in vivo, disrupts existing plaques, and partially restores distorted neurites in an Alzheimer mouse model. *J. Neurochem.* **102**, 1095–1104, doi:10.1111/j.1471-4159.2007.04613.x (2007).
- Heger, M., van Golen, R. F., Broekgaarden, M. & Michel, M. C. The molecular basis for the pharmacokinetics and pharmacodynamics of curcumin and its metabolites in relation to cancer. *Pharmacol. Rev.* **66**, 222–307, doi:10.1124/pr.110.004044 (2014).
- Lee, K. W., Bode, A. M. & Dong, Z. Molecular targets of phytochemicals for cancer prevention. *Nature Rev. Cancer* **11**, 211–218, doi:10.1038/nrc3017 (2011).

Michal Heger\* *Department of Experimental Surgery, Academic Medical Center, University of Amsterdam; and Membrane Biochemistry and Biophysics, Bijvoet Center for Biomolecular Research, Institute of Biomembranes, Utrecht University, Utrecht, the Netherlands.*

\*Corresponding author: [m.heger@amc.uva.nl](mailto:m.heger@amc.uva.nl)

(Full list of correspondents continues on next page.)

**Sally Frautschy** *Department of Neurology, University of California and the Geriatric Research Education and Clinical Center, Veterans Greater Los Angeles Health Care System, Los Angeles, California, USA.*

**David Schubert** *The Salk Institute for Biological Studies, La Jolla, California, USA.*

**Pamela Maher** *The Salk Institute for Biological Studies, La Jolla, California, USA.*

**Chongzhao Ran** *Massachusetts General Hospital, Harvard Medical School, Boston, Massachusetts, USA.*

**Anna Moore** *Massachusetts General Hospital, Harvard Medical School, Boston, Massachusetts, USA.*

**Brian J. Bacskai** *Harvard Medical School, MassGeneral Institute for Neurodegenerative Disease, Massachusetts General Hospital, Boston, Massachusetts, USA.*

**Maya Koronyo-Hamaoui** *Maxine Dunitz Neurosurgical Institute, Cedars-Sinai Medical Center, Los Angeles California, USA.*

**Yosef Koronyo** *Maxine Dunitz Neurosurgical Institute, Department of Neurosurgery, Cedars-Sinai Medical Center, Los Angeles, California, USA.*

**Ralph Martins** *Edith Cowan University, Perth, Australia.*

**Can Zhang** *Department of Neurology, Genetics and Aging Research Unit, Massachusetts General Hospital, Boston, Massachusetts, USA.*

**Rudolph E. Tanzi** *Massachusetts General Hospital, Boston, Massachusetts, USA.*

**Gregory Cole** *Department of Neurology, University of California and the Geriatric Research Education and Clinical Center, Veterans Greater Los Angeles Health Care System, Los Angeles, California, USA.*
